# Supplementary material for: Marine algal flora of São Miguel Island, Azores
Source: Biodivers Data J. 2021 Apr 16;9:e64969. doi: 10.3897/BDJ.9.e64969 (PMC8065013; doi:10.3897/BDJ.9.e64969)
Supplement: Supplementary material 1 — DP-SMG-id_15785_normalized.csv [file bdj-09-e64969-s001.csv]

occurrenceId	verbatimScientificName	scientificName	key	matchType	confidence	status	rank	kingdom	phylum	class	order	family	genus	species
	Asparagopsis armata Harvey	Asparagopsis armata Harv.	5279840	EXACT	100	ACCEPTED	SPECIES	Plantae	Rhodophyta	Florideophyceae	Bonnemaisoniales	Bonnemaisoniaceae	Asparagopsis	Asparagopsis armata
	Cladophora prolifera (Roth) Kützing	Cladophora prolifera (Roth) Kütz.	5272619	EXACT	100	ACCEPTED	SPECIES	Plantae	Chlorophyta	Ulvophyceae	Cladophorales	Cladophoraceae	Cladophora	Cladophora prolifera
	Codium elisabethiae O.C.Schmidt	Codium Stackhouse, 1797	2642664	HIGHERRANK	96	ACCEPTED	GENUS	Plantae	Chlorophyta	Ulvophyceae	Bryopsidales	Codiaceae	Codium
	Colpomenia sinuosa (Mertens ex Roth) Derbès & Solier	Colpomenia sinuosa (Mert. ex Roth) Derbès & Solier	3197958	EXACT	100	ACCEPTED	SPECIES	Chromista	Ochrophyta	Phaeophyceae	Scytosiphonales	Scytosiphonaceae	Colpomenia	Colpomenia sinuosa
	Corallina officinalis Linnaeus	Corallina officinalis Linnaeus, 1758	5276013	EXACT	100	ACCEPTED	SPECIES	Plantae	Rhodophyta	Florideophyceae	Corallinales	Corallinaceae	Corallina	Corallina officinalis
	Dictyota bartayresiana J.V.Lamouroux	Dictyota bartayresiana J.V.Lamour.	5423551	EXACT	100	ACCEPTED	SPECIES	Chromista	Ochrophyta	Phaeophyceae	Dictyotales	Dictyotaceae	Dictyota	Dictyota bartayresiana
	Gongolaria abies-marina (S.G.Gmelin) Kuntze	Gongolaria Boehmer, 1760	3197500	HIGHERRANK	96	SYNONYM	GENUS	Chromista	Ochrophyta	Phaeophyceae	Fucales	Sargassaceae	Cystoseira
	Halopteris scoparia (Linnaeus) Sauvageau	Halopteris scoparia (L.) Sauv.	5423685	EXACT	100	ACCEPTED	SPECIES	Chromista	Ochrophyta	Phaeophyceae	Sphacelariales	Stypocaulaceae	Halopteris	Halopteris scoparia
	Padina pavonica (Linnaeus) Thivy	Padina pavonica (L.) Thivy	3200186	EXACT	100	ACCEPTED	SPECIES	Chromista	Ochrophyta	Phaeophyceae	Dictyotales	Dictyotaceae	Padina	Padina pavonica
	Peyssonnelia squamaria (S.G.Gmelin) Decaisne ex J.Agardh	Peyssonnelia squamaria (S.G.Gmelin) Decaisne	2667893	EXACT	92	ACCEPTED	SPECIES	Plantae	Rhodophyta	Florideophyceae	Peyssonneliales	Peyssonneliaceae	Peyssonnelia	Peyssonnelia squamaria
	Plocamium cartilagineum (Linnaeus) P.S.Dixon	Plocamium cartilagineum (Linnaeus) P.S.Dixon	5278595	EXACT	100	ACCEPTED	SPECIES	Plantae	Rhodophyta	Florideophyceae	Plocamiales	Plocamiaceae	Plocamium	Plocamium cartilagineum
	Symphyocladia marchantioides (Harvey) Falkenberg	Symphyocladia marchantioides (Harvey) Falkenberg, 1897	2661325	EXACT	100	SYNONYM	SPECIES	Plantae	Rhodophyta	Florideophyceae	Ceramiales	Rhodomelaceae	Placophora	Placophora marchantioides
	Zonaria tournefortii (J.V.Lamouroux) Montagne	Zonaria tournefortii (J.V.Lamour.) Mont.	7777828	EXACT	100	ACCEPTED	SPECIES	Chromista	Ochrophyta	Phaeophyceae	Dictyotales	Dictyotaceae	Zonaria	Zonaria tournefortii
	Chondracanthus acicularis (Roth) Fredericq	Chondracanthus acicularis (Roth) Fredericq	5279140	EXACT	100	ACCEPTED	SPECIES	Plantae	Rhodophyta	Florideophyceae	Gigartinales	Gigartinaceae	Chondracanthus	Chondracanthus acicularis
	Chondracanthus teedei (Mertens ex Roth) Kützing	Chondracanthus teedii (Roth) Kütz.	5279143	FUZZY	100	SYNONYM	SPECIES	Plantae	Rhodophyta	Florideophyceae	Gigartinales	Gigartinaceae	Chondracanthus	Chondracanthus teedei
	Codium adhaerens C. Agradh	Codium adhaerens C.Agardh, 1822	5272156	EXACT	88	ACCEPTED	SPECIES	Plantae	Chlorophyta	Ulvophyceae	Bryopsidales	Codiaceae	Codium	Codium adhaerens
	Dictyopteris polypodioides (A.P.De Candolle) J.V.Lamouroux	Dictyopteris polypodioides (DC.) J.V.Lamour.	5423614	EXACT	100	ACCEPTED	SPECIES	Chromista	Ochrophyta	Phaeophyceae	Dictyotales	Dictyotaceae	Dictyopteris	Dictyopteris polypodioides
	Dictyota dichotoma (Hudson) J.V.Lamouroux	Dictyota dichotoma (Huds.) J.V.Lamour.	5423480	EXACT	100	ACCEPTED	SPECIES	Chromista	Ochrophyta	Phaeophyceae	Dictyotales	Dictyotaceae	Dictyota	Dictyota dichotoma
	Gelidium spinosum (S.G.Gmelin) P.C.Silva	Gelidium spinosum (S.G.Gmelin) P.C.Silva	2662738	EXACT	100	ACCEPTED	SPECIES	Plantae	Rhodophyta	Florideophyceae	Gelidiales	Gelidiaceae	Gelidium	Gelidium spinosum
	Hypnea musciformis (Wulfen) J.V.Lamouroux	Hypnea musciformis	9802728	EXACT	99	ACCEPTED	SPECIES	Plantae	Rhodophyta	Florideophyceae	Gigartinales	Cystocloniaceae	Hypnea	Hypnea musciformis
	Nitophyllum punctatum (Stackhouse) Greville	Nitophyllum punctatum (Stackh.) Grev.	2662113	EXACT	100	ACCEPTED	SPECIES	Plantae	Rhodophyta	Florideophyceae	Ceramiales	Delesseriaceae	Nitophyllum	Nitophyllum punctatum
	Pterocladiella capillacea (S.G.Gmelin) Santelices & Hommersand	Pterocladiella capillacea (S.G.Gmelin) Santel. & Hommers.	2662919	EXACT	100	ACCEPTED	SPECIES	Plantae	Rhodophyta	Florideophyceae	Gelidiales	Pterocladiaceae	Pterocladiella	Pterocladiella capillacea
	Sebdenia dichotoma Berthold	Sebdenia dichotoma Berthold, 1884	2656258	EXACT	100	ACCEPTED	SPECIES	Plantae	Rhodophyta	Florideophyceae	Sebdeniales	Sebdeniaceae	Sebdenia	Sebdenia dichotoma
	Sphaerococcus coronopifolius Stackhouse	Sphaerococcus coronopifolius Stackhouse	5279276	EXACT	100	ACCEPTED	SPECIES	Plantae	Rhodophyta	Florideophyceae	Gigartinales	Sphaerococcaceae	Sphaerococcus	Sphaerococcus coronopifolius
	Stypopodium zonale (J.V.Lamouroux) Papenfuss	Stypopodium zonale (J.V.Lamour.) Papenf.	3200586	EXACT	100	ACCEPTED	SPECIES	Chromista	Ochrophyta	Phaeophyceae	Dictyotales	Dictyotaceae	Stypopodium	Stypopodium zonale
	Ulva rigida C.Agardh	Ulva rigida C.Agardh	5273416	EXACT	100	ACCEPTED	SPECIES	Plantae	Chlorophyta	Ulvophyceae	Ulvales	Ulvaceae	Ulva	Ulva rigida
	Codium fragile (Suringar) Hariot	Codium fragile (Suringar) Hariot	5272096	EXACT	100	ACCEPTED	SPECIES	Plantae	Chlorophyta	Ulvophyceae	Bryopsidales	Codiaceae	Codium	Codium fragile
	Liagora distenta (Mertens ex Roth) J.V.Lamouroux	Liagora distenta (Mertens ex Roth) J.V.Lamour., 1816	5278699	EXACT	100	ACCEPTED	SPECIES	Plantae	Rhodophyta	Florideophyceae	Nemaliales	Liagoraceae	Liagora	Liagora distenta
	Pterothamnion crispum (Ducluzeau) Nägeli	Pterothamnion crispum (Ducluz.) Nägeli	2657088	EXACT	100	ACCEPTED	SPECIES	Plantae	Rhodophyta	Florideophyceae	Ceramiales	Ceramiaceae	Pterothamnion	Pterothamnion crispum
	Rhodymenia pseudopalmata (J.V.Lamouroux) P.C.Silva	Rhodymenia pseudopalmata (J.V.Lamouroux) P.C.Silva	2663303	EXACT	100	ACCEPTED	SPECIES	Plantae	Rhodophyta	Florideophyceae	Rhodymeniales	Rhodymeniaceae	Rhodymenia	Rhodymenia pseudopalmata
	Sargassum furcatum Kützing	Sargassum furcatum Kütz.	3197176	EXACT	100	ACCEPTED	SPECIES	Chromista	Ochrophyta	Phaeophyceae	Fucales	Sargassaceae	Sargassum	Sargassum furcatum
	Schimmelmannia schousboei (J.Agardh) J.Agardh	Schimmelmannia schousboei (Agardh) Agardh	2666899	EXACT	100	ACCEPTED	SPECIES	Plantae	Rhodophyta	Florideophyceae	Acrosymphytales	Acrosymphytaceae	Schimmelmannia	Schimmelmannia schousboei
	Scinaia furcellata (Turner) J.Agardh	Scinaia furcellata (Turner) J.Agardh, 1851	2665154	EXACT	100	ACCEPTED	SPECIES	Plantae	Rhodophyta	Florideophyceae	Nemaliales	Scinaiaceae	Scinaia	Scinaia furcellata
	Scinaia interrupta (A.P.de Candolle) M.J.Wynne	Scinaia interrupta (A.P.de Candolle) M.J.Wynne, 1989	2665140	EXACT	100	ACCEPTED	SPECIES	Plantae	Rhodophyta	Florideophyceae	Nemaliales	Scinaiaceae	Scinaia	Scinaia interrupta
	Sebdenia rodrigueziana (Feldmann) Codomier ex Athanasiadis	Sebdenia rodrigueziana (Feldmann) Codomier ex Parkinson, 1980	2656270	EXACT	89	ACCEPTED	SPECIES	Plantae	Rhodophyta	Florideophyceae	Sebdeniales	Sebdeniaceae	Sebdenia	Sebdenia rodrigueziana
	Platoma cyclocolpum (Montagne) F.Schmitz	Platoma cyclocolpum (Mont.) F.Schmitz	4375846	EXACT	100	ACCEPTED	SPECIES	Plantae	Rhodophyta	Florideophyceae	Nemastomatales	Schizymeniaceae	Platoma	Platoma cyclocolpum
	Aglaothamnion bipinnatum (P.Crouan & H.Crouan) Feldmann & G.Feldmann	Aglaothamnion bipinnatum (P.L.Crouan & H.M.Crouan) Feldmann-Mazoyer	2656977	EXACT	100	ACCEPTED	SPECIES	Plantae	Rhodophyta	Florideophyceae	Ceramiales	Callithamniaceae	Aglaothamnion	Aglaothamnion bipinnatum
	Asparagopsis armata Harvey	Asparagopsis armata Harv.	5279840	EXACT	99	ACCEPTED	SPECIES	Plantae	Rhodophyta	Florideophyceae	Bonnemaisoniales	Bonnemaisoniaceae	Asparagopsis	Asparagopsis armata
	Asparagopsis taxiformis (Delile) Trevisan	Asparagopsis taxiformis (Delile) Trevis.	5279834	EXACT	100	ACCEPTED	SPECIES	Plantae	Rhodophyta	Florideophyceae	Bonnemaisoniales	Bonnemaisoniaceae	Asparagopsis	Asparagopsis taxiformis
	Centroceras clavulatum (C.Agardh) Montagne	Centroceras clavulatum (C.Agardh) Mont.	5276780	EXACT	100	ACCEPTED	SPECIES	Plantae	Rhodophyta	Florideophyceae	Ceramiales	Ceramiaceae	Centroceras	Centroceras clavulatum
	Ceramium tenuicorne (Kützing) Waern	Ceramium tenuicorne (Kützing) Waern	5277182	EXACT	99	ACCEPTED	SPECIES	Plantae	Rhodophyta	Florideophyceae	Ceramiales	Ceramiaceae	Ceramium	Ceramium tenuicorne
	Codium decorticatum (Woodward) M.Howe	Codium decorticatum (Woodw.) M.A.Howe	5272147	EXACT	100	ACCEPTED	SPECIES	Plantae	Chlorophyta	Ulvophyceae	Bryopsidales	Codiaceae	Codium	Codium decorticatum
	Codium fragile subsp. fragile (Suringar) Hariot	Codium fragile subsp. fragile	7230558	EXACT	100	ACCEPTED	SUBSPECIES	Plantae	Chlorophyta	Ulvophyceae	Bryopsidales	Codiaceae	Codium	Codium fragile
	Pseudochlorodesmis furcellata (Zanardini) Børgesen	Pseudochlorodesmis furcellata (Zanardini) Børgesen, 1925	2643411	EXACT	100	ACCEPTED	SPECIES	Plantae	Chlorophyta	Ulvophyceae	Bryopsidales	Udoteaceae	Pseudochlorodesmis	Pseudochlorodesmis furcellata
	Aglaothamnion tenuissimum (Bonnemaison) Feldmann-Mazoyer	Aglaothamnion tenuissimum (Bonnemaison) Feldmann-Mazoyer	2656888	EXACT	100	ACCEPTED	SPECIES	Plantae	Rhodophyta	Florideophyceae	Ceramiales	Callithamniaceae	Aglaothamnion	Aglaothamnion tenuissimum
	Amphiroa beauvoisii J.V.Lamouroux	Amphiroa beauvoisii J.V.Lamour.	5276511	EXACT	100	ACCEPTED	SPECIES	Plantae	Rhodophyta	Florideophyceae	Corallinales	Corallinaceae	Amphiroa	Amphiroa beauvoisii
	Gaillona gallica (Nägeli) Athanasiadis	Gaillona Bonnemaison, 1828	4890364	HIGHERRANK	94	DOUBTFUL	GENUS	Plantae	Rhodophyta	Florideophyceae	Ceramiales	Callithamniaceae	Gaillona
	Halopteris filicina (Grateloup) Kützing	Halopteris filicina (Gratel.) Kütz.	5423671	EXACT	100	ACCEPTED	SPECIES	Chromista	Ochrophyta	Phaeophyceae	Sphacelariales	Stypocaulaceae	Halopteris	Halopteris filicina
	Jania verrucosa J.V.Lamouroux	Jania J.V.Lamouroux, 1812	2655124	HIGHERRANK	95	ACCEPTED	GENUS	Plantae	Rhodophyta	Florideophyceae	Corallinales	Corallinaceae	Jania
	Jania virgata (Zanardini) Montagne	Jania virgata (Zanardini) Mont., 1846	5276147	EXACT	100	ACCEPTED	SPECIES	Plantae	Rhodophyta	Florideophyceae	Corallinales	Corallinaceae	Jania	Jania virgata
	Kallymenia reniformis (Turner) J.Agardh	Kallymenia reniformis (Turner) J.G.Agardh	2666738	EXACT	100	ACCEPTED	SPECIES	Plantae	Rhodophyta	Florideophyceae	Gigartinales	Kallymeniaceae	Kallymenia	Kallymenia reniformis
	Phyllophora crispa (Hudson) P.S.Dixon	Phyllophora crispa (Hudson) P.S.Dixon	5279442	EXACT	100	ACCEPTED	SPECIES	Plantae	Rhodophyta	Florideophyceae	Gigartinales	Phyllophoraceae	Phyllophora	Phyllophora crispa
	Radicilingua thysanorhizans (Holmes) Papenfuss	Radicilingua thysanorhizans (Holmes) Papenf., 1956	2661807	EXACT	100	ACCEPTED	SPECIES	Plantae	Rhodophyta	Florideophyceae	Ceramiales	Delesseriaceae	Radicilingua	Radicilingua thysanorhizans
	Scytosiphon lomentaria (Lyngbye) Link	Scytosiphon lomentaria (Lyngb.) Link	5422803	EXACT	100	ACCEPTED	SPECIES	Chromista	Ochrophyta	Phaeophyceae	Scytosiphonales	Scytosiphonaceae	Scytosiphon	Scytosiphon lomentaria
	Bryopsis hypnoides J.V.Lamouroux	Bryopsis hypnoides J.V.Lamour.	5272051	EXACT	100	ACCEPTED	SPECIES	Plantae	Chlorophyta	Ulvophyceae	Bryopsidales	Bryopsidaceae	Bryopsis	Bryopsis hypnoides
	Caulacanthus ustulatus (Turner) Kützing	Caulacanthus ustulatus (Mertens ex Turner) Kütz., 1843	2666536	EXACT	100	ACCEPTED	SPECIES	Plantae	Rhodophyta	Florideophyceae	Gigartinales	Caulacanthaceae	Caulacanthus	Caulacanthus ustulatus
	Cystoseira compressa (Esper) Gerloff & Nizamuddin	Cystoseira compressa (Esper) Gerloff & Nizamuddin, 1975	8188962	EXACT	100	ACCEPTED	SPECIES	Chromista	Ochrophyta	Phaeophyceae	Fucales	Sargassaceae	Cystoseira	Cystoseira compressa
	Jania crassa J.V.Lamouroux	Jania crassa J.V.Lamour.	5276190	EXACT	100	ACCEPTED	SPECIES	Plantae	Rhodophyta	Florideophyceae	Corallinales	Corallinaceae	Jania	Jania crassa
	Jania longifurca Zanardini	Jania longifurca Zanardini, 1844	5276157	EXACT	100	ACCEPTED	SPECIES	Plantae	Rhodophyta	Florideophyceae	Corallinales	Corallinaceae	Jania	Jania longifurca
	Jania rubens (Linnaeus) J.V.Lamouroux	Jania rubens (Linnaeus) J.V.Lamouroux	5276203	EXACT	100	ACCEPTED	SPECIES	Plantae	Rhodophyta	Florideophyceae	Corallinales	Corallinaceae	Jania	Jania rubens
	Laurencia pyramidalis Bory ex Kützing	Laurencia pyramidalis Bory ex Kütz., 1849	8178600	EXACT	100	ACCEPTED	SPECIES	Plantae	Rhodophyta	Florideophyceae	Ceramiales	Rhodomelaceae	Laurencia	Laurencia pyramidalis
	Osmundea pinnatifida (Hudson) Stackhouse	Osmundea pinnatifida (Huds.) Stackh.	2659421	EXACT	100	SYNONYM	SPECIES	Plantae	Rhodophyta	Florideophyceae	Ceramiales	Rhodomelaceae	Osmundea	Osmundea ramosissima
	Ptilothamnion pluma (Dillwyn) Thuret	Ptilothamnion pluma (Dillwyn) Thuret	2658400	EXACT	100	ACCEPTED	SPECIES	Plantae	Rhodophyta	Florideophyceae	Ceramiales	Wrangeliaceae	Ptilothamnion	Ptilothamnion pluma
	Ellisolandia elongata (J.Ellis & Solander) K.R.Hind & G.W.Saunders	Ellisolandia elongata (J.Ellis & Sol.) K.R.Hind & G.W.Saunders	8103861	EXACT	100	ACCEPTED	SPECIES	Plantae	Rhodophyta	Florideophyceae	Corallinales	Corallinaceae	Ellisolandia	Ellisolandia elongata
	Acrosorium ciliolatum (Harvey) Kylin	Acrosorium ciliolatum (Harv.) Kylin	2662395	EXACT	100	ACCEPTED	SPECIES	Plantae	Rhodophyta	Florideophyceae	Ceramiales	Delesseriaceae	Acrosorium	Acrosorium ciliolatum
	Cryptopleura ramosa (Hudson) L.Newton	Cryptopleura ramosa (Hudson) L.Newton	5278328	EXACT	100	ACCEPTED	SPECIES	Plantae	Rhodophyta	Florideophyceae	Ceramiales	Delesseriaceae	Cryptopleura	Cryptopleura ramosa
	Dudresnaya verticillata (Withering) Le Jolis	Dudresnaya verticillata (Withering) Le Jolis	5279318	EXACT	100	ACCEPTED	SPECIES	Plantae	Rhodophyta	Florideophyceae	Gigartinales	Dumontiaceae	Dudresnaya	Dudresnaya verticillata
	Meredithia microphylla (J.Agardh) J.Agardh	Meredithia microphylla (J.G.Arardh) J.G.Agardh	5279253	EXACT	100	ACCEPTED	SPECIES	Plantae	Rhodophyta	Florideophyceae	Gigartinales	Kallymeniaceae	Meredithia	Meredithia microphylla
	Anotrichium furcellatum (J.Agardh) Baldock	Anotrichium furcellatum (J.Agardh) Baldock	2656854	EXACT	100	ACCEPTED	SPECIES	Plantae	Rhodophyta	Florideophyceae	Ceramiales	Wrangeliaceae	Anotrichium	Anotrichium furcellatum
	Botryocladia macaronesica Afonso-Carillo	Botryocladia (J.Agardh) Kylin, 1931	2663148	HIGHERRANK	91	ACCEPTED	GENUS	Plantae	Rhodophyta	Florideophyceae	Rhodymeniales	Rhodymeniaceae	Botryocladia
	Canistrocarpus cervicornis (Kützing) De Paula & De Clerck	Canistrocarpus cervicornis (Kütz.) J.C.De Paula & De Clerck	4377177	EXACT	100	ACCEPTED	SPECIES	Chromista	Ochrophyta	Phaeophyceae	Dictyotales	Dictyotaceae	Canistrocarpus	Canistrocarpus cervicornis
	Chaetomorpha aerea (Dillwyn) Kützing	Chaetomorpha aerea (Dillwyn) Kützing	2644557	EXACT	100	SYNONYM	SPECIES	Plantae	Chlorophyta	Ulvophyceae	Cladophorales	Cladophoraceae	Chaetomorpha	Chaetomorpha linum
	Dudresnaya crassa M.Howe	Dudresnaya crassa	5279317	EXACT	100	ACCEPTED	SPECIES	Plantae	Rhodophyta	Florideophyceae	Gigartinales	Dumontiaceae	Dudresnaya	Dudresnaya crassa
	Gaillona hookeri (Dillwyn) Athanasiadis	Gaillona Bonnemaison, 1828	4890364	HIGHERRANK	94	DOUBTFUL	GENUS	Plantae	Rhodophyta	Florideophyceae	Ceramiales	Callithamniaceae	Gaillona
	Hypoglossum hypoglossoides (Stackhouse) Collins & Hervey	Hypoglossum hypoglossoides (Stackhouse) F.S.Collins & Hervey	2661577	EXACT	100	ACCEPTED	SPECIES	Plantae	Rhodophyta	Florideophyceae	Ceramiales	Delesseriaceae	Hypoglossum	Hypoglossum hypoglossoides
	Liagora viscida (Forsskal) C.Agardh	Liagora viscida (Forsskal) C.A.Agardh	5278729	EXACT	99	ACCEPTED	SPECIES	Plantae	Rhodophyta	Florideophyceae	Nemaliales	Liagoraceae	Liagora	Liagora viscida
	Rhodymenia holmesii Ardissone	Rhodymenia holmesii Ardiss.	2663356	EXACT	100	ACCEPTED	SPECIES	Plantae	Rhodophyta	Florideophyceae	Rhodymeniales	Rhodymeniaceae	Rhodymenia	Rhodymenia holmesii
	Schizymenia apoda (J.Agardh) J.Agardh	Schizymenia apoda	2665954	EXACT	100	ACCEPTED	SPECIES	Plantae	Rhodophyta	Florideophyceae	Nemastomatales	Schizymeniaceae	Schizymenia	Schizymenia apoda
	Vertebrata foetidissima (Cocks ex Bornet) Díaz-Tapia & Maggs	Vertebrata S.F.Gray, 1821	2660342	HIGHERRANK	96	ACCEPTED	GENUS	Plantae	Rhodophyta	Florideophyceae	Ceramiales	Rhodomelaceae	Vertebrata
	Callithamnion granulatum (Ducluzeau) C. Agardh	Callithamnion granulatum (Ducluz.) C.Agardh	2658548	EXACT	100	ACCEPTED	SPECIES	Plantae	Rhodophyta	Florideophyceae	Ceramiales	Callithamniaceae	Callithamnion	Callithamnion granulatum
	Carradoriella denudata (Dillwyn) Savoie & G.W.Saunders	Carradoriella P.C.Silva, 1996	2659269	HIGHERRANK	96	SYNONYM	GENUS	Plantae	Rhodophyta	Florideophyceae	Ceramiales	Rhodomelaceae	Polysiphonia
	Chaetomorpha linum (O.F.Müller) Kützing	Chaetomorpha linum (O.F.Müller) Kützing	2644592	EXACT	100	ACCEPTED	SPECIES	Plantae	Chlorophyta	Ulvophyceae	Cladophorales	Cladophoraceae	Chaetomorpha	Chaetomorpha linum
	Dermocorynus dichotomus (J.Agardh) Gargiulo	Dermocorynus dichotomus (J.Agardh) Gargiulo, M.Morabito & Manghisi, 2013	8195465	EXACT	99	DOUBTFUL	SPECIES	Plantae	Rhodophyta	Florideophyceae	Halymeniales	Halymeniaceae	Grateloupia	Dermocorynus dichotomus
	Drachiella heterocarpa (Chauvin ex Duby) Maggs & Hommersand	Drachiella heterocarpa (Chauv. ex Duby) Maggs & Hommers., 1993	5278349	EXACT	100	ACCEPTED	SPECIES	Plantae	Rhodophyta	Florideophyceae	Ceramiales	Delesseriaceae	Drachiella	Drachiella heterocarpa
	Gelidium microdon Kützing	Gelidium J.V.Lamour.	9460134	HIGHERRANK	96	ACCEPTED	GENUS	Plantae	Rhodophyta	Florideophyceae	Gelidiales	Gelidiaceae	Gelidium
	Gigartina pistillata (S.G.Gmelin) Stackhouse	Gigartina pistillata (S.G.Gmel.) Stackh.	2666168	EXACT	100	ACCEPTED	SPECIES	Plantae	Rhodophyta	Florideophyceae	Gigartinales	Gigartinaceae	Gigartina	Gigartina pistillata
	Gymnogongrus griffithsiae (Turner) C.Martius	Gymnogongrus griffithsiae (Turner) Mart.	2667139	EXACT	100	ACCEPTED	SPECIES	Plantae	Rhodophyta	Florideophyceae	Gigartinales	Phyllophoraceae	Gymnogongrus	Gymnogongrus griffithsiae
	Haraldiophyllum bonnemaisonii (Kylin) A.D.Zinova	Haraldiophyllum bonnemaisonii (Kylin) A.D.Zinova, 1981	2661548	EXACT	100	ACCEPTED	SPECIES	Plantae	Rhodophyta	Florideophyceae	Ceramiales	Delesseriaceae	Haraldiophyllum	Haraldiophyllum bonnemaisonii
	Osmundea hybrida (A.P.de Candolle) K.W.Nam	Osmundea hybrida (DC.) K.W.Nam	2659413	EXACT	100	ACCEPTED	SPECIES	Plantae	Rhodophyta	Florideophyceae	Ceramiales	Rhodomelaceae	Osmundea	Osmundea hybrida
	Phyllophora sicula (Kützing) Guiry & L.M.Irvine	Phyllophora sicula (Kütz.) Guiry & L.M.Irvine, 1976	5279436	EXACT	100	ACCEPTED	SPECIES	Plantae	Rhodophyta	Florideophyceae	Gigartinales	Phyllophoraceae	Phyllophora	Phyllophora sicula
	Ulva clathrata (Roth) C.Agardh	Ulva clathrata (Roth) C.Agardh	9402904	EXACT	100	ACCEPTED	SPECIES	Plantae	Chlorophyta	Ulvophyceae	Ulvales	Ulvaceae	Ulva	Ulva clathrata
	Gymnogongrus crenulatus (Turner) J.Agardh	Gymnogongrus crenulatus (Turner) J.Agardh, 1851	2667130	EXACT	100	ACCEPTED	SPECIES	Plantae	Rhodophyta	Florideophyceae	Gigartinales	Phyllophoraceae	Gymnogongrus	Gymnogongrus crenulatus
	Mesogloia vermiculata (Smith) S.F.Gray	Mesogloia vermiculata (Sm.) Gray	3198634	EXACT	100	ACCEPTED	SPECIES	Chromista	Ochrophyta	Phaeophyceae	Ectocarpales	Chordariaceae	Mesogloia	Mesogloia vermiculata
	Apoglossum ruscifolium (Turner) J.Agardh	Apoglossum ruscifolium (Turner) J.Agardh	2661774	EXACT	100	ACCEPTED	SPECIES	Plantae	Rhodophyta	Florideophyceae	Ceramiales	Delesseriaceae	Apoglossum	Apoglossum ruscifolium
	Balliella cladoderma (Zanardini) Athanasiadis	Balliella cladoderma (Zanardini) Athanasiadis, 1987	5277214	EXACT	100	ACCEPTED	SPECIES	Plantae	Rhodophyta	Florideophyceae	Ceramiales	Ceramiaceae	Balliella	Balliella cladoderma
	Ceramium echionotum J.Agardh	Ceramium echionotum J.Agardh	5276967	EXACT	100	ACCEPTED	SPECIES	Plantae	Rhodophyta	Florideophyceae	Ceramiales	Ceramiaceae	Ceramium	Ceramium echionotum
	Codium vermilara (Olivi) Delle Chiaje	Codium vermilara (Olivis) Chiaje, 1829	5272160	EXACT	100	ACCEPTED	SPECIES	Plantae	Chlorophyta	Ulvophyceae	Bryopsidales	Codiaceae	Codium	Codium vermilara
	Hydroclathrus clathratus (C.Agardh) M.Howe	Hydroclathrus clathratus (C.Agardh) M.Howe	3198487	EXACT	100	ACCEPTED	SPECIES	Chromista	Ochrophyta	Phaeophyceae	Scytosiphonales	Scytosiphonaceae	Hydroclathrus	Hydroclathrus clathratus
	Pleonosporium borreri (Smith) Nägeli	Pleonosporium borreri (J.E.Sm.) Nägeli	2658677	EXACT	100	ACCEPTED	SPECIES	Plantae	Rhodophyta	Florideophyceae	Ceramiales	Wrangeliaceae	Pleonosporium	Pleonosporium borreri
	Polysiphonia atlantica Kapraun & J.N.Norris	Polysiphonia atlantica Kapraun & J.N.Norris	5277654	EXACT	100	ACCEPTED	SPECIES	Plantae	Rhodophyta	Florideophyceae	Ceramiales	Rhodomelaceae	Polysiphonia	Polysiphonia atlantica
	Sargassum cymosum C.Agardh	Sargassum cymosum C.Agardh	3196902	EXACT	100	ACCEPTED	SPECIES	Chromista	Ochrophyta	Phaeophyceae	Fucales	Sargassaceae	Sargassum	Sargassum cymosum
	Zanardinia typus (Nardo) P.C.Silva	Zanardinia typus (Nardo) P.C.Silva, 2000	8389576	EXACT	100	ACCEPTED	SPECIES	Chromista	Ochrophyta	Phaeophyceae	Cutleriales	Cutleriaceae	Zanardinia	Zanardinia typus
	Cladostephus spongiosus (Hudson) C.Agardh	Cladostephus spongiosus (Huds.) C.Agardh	3200756	EXACT	100	ACCEPTED	SPECIES	Chromista	Ochrophyta	Phaeophyceae	Sphacelariales	Cladostephaceae	Cladostephus	Cladostephus spongiosus
	Grateloupia filicina (J.V.Lamouroux) C.Agardh	Grateloupia filicina (J.V.Lamour.) C.Agardh	5729905	EXACT	100	ACCEPTED	SPECIES	Plantae	Rhodophyta	Florideophyceae	Halymeniales	Halymeniaceae	Grateloupia	Grateloupia filicina
	Myrionema strangulans Greville	Myrionema strangulans Grev.	5423151	EXACT	100	ACCEPTED	SPECIES	Chromista	Ochrophyta	Phaeophyceae	Ectocarpales	Chordariaceae	Myrionema	Myrionema strangulans
	Anotrichium barbatum (C.Agardh) Nägeli	Anotrichium barbatum (C.Agardh) Nägeli, 1862	9199390	EXACT	100	SYNONYM	SPECIES	Plantae	Rhodophyta	Florideophyceae	Ceramiales	Wrangeliaceae	Ptilothamnion	Ptilothamnion pluma
	Callithamnion tetricum (Dillwyn) S.F.Gray	Callithamnion tetricum (Dillwyn) Gray	2658510	EXACT	100	ACCEPTED	SPECIES	Plantae	Rhodophyta	Florideophyceae	Ceramiales	Callithamniaceae	Callithamnion	Callithamnion tetricum
	Ceramium pallidum (Kützing) Maggs & Hommersand	Ceramium pallidum (Nägeli ex Kütz.) Maggs & Hommers.	5276988	EXACT	99	ACCEPTED	SPECIES	Plantae	Rhodophyta	Florideophyceae	Ceramiales	Ceramiaceae	Ceramium	Ceramium pallidum
	Champia parvula (C.Agardh) Harvey	Champia parvula (C.Agardh) Harv.	2663441	EXACT	100	ACCEPTED	SPECIES	Plantae	Rhodophyta	Florideophyceae	Rhodymeniales	Champiaceae	Champia	Champia parvula
	Cladophora lehmanniana (Lindenberg) Kützing	Cladophora lehmanniana (Lindenb.) Kütz.	5272598	EXACT	100	ACCEPTED	SPECIES	Plantae	Chlorophyta	Ulvophyceae	Cladophorales	Cladophoraceae	Cladophora	Cladophora lehmanniana
	Dictyota dichotoma var. intricata (C.Agardh) Greville	Dictyota dichotoma var. intricata (C.Agardh) Grev., 1830	5423488	EXACT	100	ACCEPTED	VARIETY	Chromista	Ochrophyta	Phaeophyceae	Dictyotales	Dictyotaceae	Dictyota	Dictyota dichotoma
	Gayliella flaccida (Harvey ex Kützing) T.O.Cho & L.J.McIvor	Gayliella flaccidum (Harv. ex Kütz.) T.O.Cho & L.J.McIvor	4376073	FUZZY	97	SYNONYM	SPECIES	Plantae	Rhodophyta	Florideophyceae	Ceramiales	Ceramiaceae	Ceramium	Ceramium flaccidum
	Gelidium pusillum (Stackhouse) Le Jolis	Gelidium pusillum (Stackh.) Le Jol.	2662756	EXACT	100	ACCEPTED	SPECIES	Plantae	Rhodophyta	Florideophyceae	Gelidiales	Gelidiaceae	Gelidium	Gelidium pusillum
	Jania pedunculata var. adhaerens (J.V.Lamouroux) A.S.Harvey	Jania pedunculata J.V.Lamour.	5276186	HIGHERRANK	96	ACCEPTED	SPECIES	Plantae	Rhodophyta	Florideophyceae	Corallinales	Corallinaceae	Jania	Jania pedunculata
	Lomentaria articulata (Hudson) Lyngbye	Lomentaria articulata (Huds.) Lyngb.	2663537	EXACT	100	ACCEPTED	SPECIES	Plantae	Rhodophyta	Florideophyceae	Rhodymeniales	Lomentariaceae	Lomentaria	Lomentaria articulata
	Nemalion elminthoides (Velley) Batters	Nemalion elminthoides (Velley) Batters	7658841	EXACT	100	SYNONYM	SPECIES	Plantae	Rhodophyta	Florideophyceae	Nemaliales	Liagoraceae	Nemalion	Nemalion multifidum
	Pterothamnion plumula (J.Ellis) Nägeli	Pterothamnion plumula (J.Ellis) Nägeli	2657052	EXACT	100	ACCEPTED	SPECIES	Plantae	Rhodophyta	Florideophyceae	Ceramiales	Ceramiaceae	Pterothamnion	Pterothamnion plumula
	Schottera nicaeensis (J.V.Lamouroux ex Duby) Guiry & Hollenberg	Schottera nicaeensis (Duby) Guiry & Hollenb.	4278213	EXACT	100	ACCEPTED	SPECIES	Plantae	Rhodophyta	Florideophyceae	Gigartinales	Phyllophoraceae	Schottera	Schottera nicaeensis
	Taonia atomaria (Woodward) J.Agardh	Taonia atomaria (Woodw.) J.Agardh	3200436	EXACT	100	ACCEPTED	SPECIES	Chromista	Ochrophyta	Phaeophyceae	Dictyotales	Dictyotaceae	Taonia	Taonia atomaria
	Valonia utricularis (Roth) C. Agardh	Valonia utricularis (Roth) C.Agardh	5273060	EXACT	100	ACCEPTED	SPECIES	Plantae	Chlorophyta	Ulvophyceae	Siphonocladales	Valoniaceae	Valonia	Valonia utricularis
	Botryocladia botryoides (Wulfen) Feldmann	Botryocladia botryoides (Wulfen) Feldmann	2663201	EXACT	100	DOUBTFUL	SPECIES	Plantae	Rhodophyta	Florideophyceae	Rhodymeniales	Rhodymeniaceae	Chrysymenia	Botryocladia botryoides
	Bryopsis plumosa (Hudson) C.Agardh	Bryopsis plumosa (Hudson) C.Agardh	5272029	EXACT	100	ACCEPTED	SPECIES	Plantae	Chlorophyta	Ulvophyceae	Bryopsidales	Bryopsidaceae	Bryopsis	Bryopsis plumosa
	Callithamnion tetragonum (Withering) S.F.Gray	Callithamnion tetragonum (Withering) S.F.Gray	2658566	EXACT	100	ACCEPTED	SPECIES	Plantae	Rhodophyta	Florideophyceae	Ceramiales	Callithamniaceae	Callithamnion	Callithamnion tetragonum
	Ceramium botryocarpum A.W.Griffiths ex Harvey	Ceramium botryocarpum A.W.Griffiths ex Harv.	5276826	EXACT	100	ACCEPTED	SPECIES	Plantae	Rhodophyta	Florideophyceae	Ceramiales	Ceramiaceae	Ceramium	Ceramium botryocarpum
	Ceramium cimbricum H.E.Petersen	Ceramium cimbricum H.E.Petersen	5276950	EXACT	100	ACCEPTED	SPECIES	Plantae	Rhodophyta	Florideophyceae	Ceramiales	Ceramiaceae	Ceramium	Ceramium cimbricum
	Ceramium deslongchampsii Chauvin ex Duby	Ceramium deslongchampsii Chauv. ex Duby	5276814	EXACT	100	ACCEPTED	SPECIES	Plantae	Rhodophyta	Florideophyceae	Ceramiales	Ceramiaceae	Ceramium	Ceramium deslongchampsii
	Ceramium diaphanum (Lightfoot) Roth	Ceramium diaphanum (Lightfoot) Roth	5277142	EXACT	100	ACCEPTED	SPECIES	Plantae	Rhodophyta	Florideophyceae	Ceramiales	Ceramiaceae	Ceramium	Ceramium diaphanum
	Ceramium secundatum Lyngbye	Ceramium secundatum Lyngbye	5276835	EXACT	100	ACCEPTED	SPECIES	Plantae	Rhodophyta	Florideophyceae	Ceramiales	Ceramiaceae	Ceramium	Ceramium secundatum
	Chondria coerulescens (J.Agardh) Sauvageau	Chondria coerulescens (J.Agardh) Falkenb.	5279755	EXACT	92	ACCEPTED	SPECIES	Plantae	Rhodophyta	Florideophyceae	Ceramiales	Rhodomelaceae	Chondria	Chondria coerulescens
	Chondria dasyphylla (Woodward) C.Agardh	Chondria dasyphylla (Woodward) C.Agardh	7769508	EXACT	100	ACCEPTED	SPECIES	Plantae	Rhodophyta	Florideophyceae	Ceramiales	Rhodomelaceae	Chondria	Chondria dasyphylla
	Cladophora laetevirens (Dillwyn) Kützing	Cladophora laetevirens (Dillwyn) Kützing	5272485	EXACT	100	ACCEPTED	SPECIES	Plantae	Chlorophyta	Ulvophyceae	Cladophorales	Cladophoraceae	Cladophora	Cladophora laetevirens
	Gastroclonium ovatum (Hudson) Papenfuss	Gastroclonium ovatum (Huds.) Papenf.	2663787	EXACT	100	ACCEPTED	SPECIES	Plantae	Rhodophyta	Florideophyceae	Rhodymeniales	Champiaceae	Gastroclonium	Gastroclonium ovatum
	Gastroclonium reflexum (Chauvin) Kützing	Gastroclonium reflexum (Chauv.) Kütz., 1849	2663799	EXACT	100	ACCEPTED	SPECIES	Plantae	Rhodophyta	Florideophyceae	Rhodymeniales	Champiaceae	Gastroclonium	Gastroclonium reflexum
	Laurencia brongniartii J.Agardh	Laurencia brongniartii J.Agardh, 1841	2661081	EXACT	100	ACCEPTED	SPECIES	Plantae	Rhodophyta	Florideophyceae	Ceramiales	Rhodomelaceae	Laurencia	Laurencia brongniartii
	Laurencia obtusa (Hudson) J.V.Lamouroux	Laurencia obtusa (Huds.) J.V.Lamour.	2661137	EXACT	100	SYNONYM	SPECIES	Plantae	Rhodophyta	Florideophyceae	Ceramiales	Rhodomelaceae	Laurencia	Laurencia dendroidea
	Laurencia viridis Gil-Rodríguez & Haroun	Laurencia viridis	2660968	EXACT	99	ACCEPTED	SPECIES	Plantae	Rhodophyta	Florideophyceae	Ceramiales	Rhodomelaceae	Laurencia	Laurencia viridis
	Sphaerotrichia divaricata (C.Agardh) Kylin	Sphaerotrichia divaricata (C.Agardh) Kylin	3199116	EXACT	100	ACCEPTED	SPECIES	Chromista	Ochrophyta	Phaeophyceae	Ectocarpales	Chordariaceae	Sphaerotrichia	Sphaerotrichia divaricata
	Tenarea tortuosa (Esper) Me.Lemoine	Tenarea tortuosa (Esper) M.Lemoine, 1910	2655628	EXACT	100	SYNONYM	SPECIES	Plantae	Rhodophyta	Florideophyceae	Corallinales	Corallinaceae	Lithophyllum	Lithophyllum tortuosum
	Ceramium virgatum Roth	Ceramium virgatum Roth	5277079	EXACT	100	ACCEPTED	SPECIES	Plantae	Rhodophyta	Florideophyceae	Ceramiales	Ceramiaceae	Ceramium	Ceramium virgatum
	Carradoriella elongata (Hudson) A.M.Savoie & G.W.Saunders	Carradoriella P.C.Silva, 1996	2659269	HIGHERRANK	96	SYNONYM	GENUS	Plantae	Rhodophyta	Florideophyceae	Ceramiales	Rhodomelaceae	Polysiphonia
	Ceramium ciliatum (J.Ellis) Ducluzeau	Ceramium ciliatum (J.Ellis) Ducluz.	5276853	EXACT	100	SYNONYM	SPECIES	Plantae	Rhodophyta	Florideophyceae	Ceramiales	Ceramiaceae	Ceramium	Ceramium shuttleworthianum
	Cystoseira foeniculacea (Linnaeus) Greville	Cystoseira foeniculacea (L.) Grev.	3197777	EXACT	100	ACCEPTED	SPECIES	Chromista	Ochrophyta	Phaeophyceae	Fucales	Sargassaceae	Cystoseira	Cystoseira foeniculacea
	Dasya hutchinsiae Harvey	Dasya hutchinsiae Harv.	2659162	EXACT	100	ACCEPTED	SPECIES	Plantae	Rhodophyta	Florideophyceae	Ceramiales	Dasyaceae	Dasya	Dasya hutchinsiae
	Dasya ocellata (Grateloup) Harvey	Dasya ocellata (Gratel.) Harv.	2659178	EXACT	100	ACCEPTED	SPECIES	Plantae	Rhodophyta	Florideophyceae	Ceramiales	Dasyaceae	Dasya	Dasya ocellata
	Myriogramme minuta Kylin	Myriogramme minuta Kylin, 1924	2662325	EXACT	100	ACCEPTED	SPECIES	Plantae	Rhodophyta	Florideophyceae	Ceramiales	Delesseriaceae	Myriogramme	Myriogramme minuta
	Scagelia pylaisaei (Montagne) M.J.Wynne	Scagelia pylaisaei (Montagne) M.J.Wynne, 1985	2656795	EXACT	100	ACCEPTED	SPECIES	Plantae	Rhodophyta	Florideophyceae	Ceramiales	Ceramiaceae	Scagelia	Scagelia pylaisaei
	Spermothamnion repens (Dillwyn) Magnus	Spermothamnion repens (Dillwyn) Rosenvinge	2657330	EXACT	92	ACCEPTED	SPECIES	Plantae	Rhodophyta	Florideophyceae	Ceramiales	Wrangeliaceae	Spermothamnion	Spermothamnion repens
	Antithamnion diminuatum Wollaston	Antithamnion Nägeli, 1847	2657411	HIGHERRANK	96	ACCEPTED	GENUS	Plantae	Rhodophyta	Florideophyceae	Ceramiales	Ceramiaceae	Antithamnion
	Ceramium circinatum (Kützing) J.Agardh	Ceramium circinatum (Kützing) J.Agardh	5276936	EXACT	99	ACCEPTED	SPECIES	Plantae	Rhodophyta	Florideophyceae	Ceramiales	Ceramiaceae	Ceramium	Ceramium circinatum
	Cladophora coelothrix Kützing	Cladophora coelothrix Kütz.	5272740	EXACT	100	ACCEPTED	SPECIES	Plantae	Chlorophyta	Ulvophyceae	Cladophorales	Cladophoraceae	Cladophora	Cladophora coelothrix
	Dictyota implexa (Desfontaines) J.V.Lamouroux	Dictyota implexa (Desf.) J.V.Lamour.	5423476	EXACT	100	ACCEPTED	SPECIES	Chromista	Ochrophyta	Phaeophyceae	Dictyotales	Dictyotaceae	Dictyota	Dictyota implexa
	Ectocarpus siliculosus (Dillwyn) Lyngbye	Ectocarpus siliculosus (Dillwyn) Lyngb.	3199521	EXACT	100	ACCEPTED	SPECIES	Chromista	Ochrophyta	Phaeophyceae	Ectocarpales	Ectocarpaceae	Ectocarpus	Ectocarpus siliculosus
	Griffithsia corallinoides (Linnaeus) Trevisan	Griffithsia corallinoides (Linnaeus) Trevisan	2657564	EXACT	100	ACCEPTED	SPECIES	Plantae	Rhodophyta	Florideophyceae	Ceramiales	Wrangeliaceae	Griffithsia	Griffithsia corallinoides
	Porphyra umbilicalis Kützing	Porphyra umbilicalis (Linnaeus) Kützing	5275705	EXACT	100	ACCEPTED	SPECIES	Plantae	Rhodophyta	Bangiophyceae	Bangiales	Bangiaceae	Porphyra	Porphyra umbilicalis
	Taenioma nanum (Kützing) Papenfuss	Taenioma nanum (Kütz.) Papenf.	5278204	EXACT	100	ACCEPTED	SPECIES	Plantae	Rhodophyta	Florideophyceae	Ceramiales	Delesseriaceae	Taenioma	Taenioma nanum
	Ulva intestinalis Linnaeus	Ulva intestinalis L.	5273394	EXACT	100	ACCEPTED	SPECIES	Plantae	Chlorophyta	Ulvophyceae	Ulvales	Ulvaceae	Ulva	Ulva intestinalis
	Vertebrata furcellata (C.Agardh) Kuntze	Vertebrata furcellata (C.Agardh) Kuntze, 1891	7881767	EXACT	100	ACCEPTED	SPECIES	Plantae	Rhodophyta	Florideophyceae	Ceramiales	Rhodomelaceae	Vertebrata	Vertebrata furcellata
	Ascophyllum nodosum (Linnaeus) Le Jolis	Ascophyllum nodosum (L.) Le Jol.	3196524	EXACT	100	ACCEPTED	SPECIES	Chromista	Ochrophyta	Phaeophyceae	Fucales	Fucaceae	Ascophyllum	Ascophyllum nodosum
	Bornetia secundiflora (J.Agardh) Thuret	Bornetia secundiflora (J.Agardh) Thur., 1855	2658705	EXACT	100	ACCEPTED	SPECIES	Plantae	Rhodophyta	Florideophyceae	Ceramiales	Ceramiaceae	Bornetia	Bornetia secundiflora
	Callithamnion corymbosum (Smith) Lyngbye	Callithamnion corymbosum (J.E.Smith) Lyngbye	2658582	EXACT	100	ACCEPTED	SPECIES	Plantae	Rhodophyta	Florideophyceae	Ceramiales	Callithamniaceae	Callithamnion	Callithamnion corymbosum
	Feldmannia mitchelliae (Harvey) H.-S.Kim	Feldmannia mitchelliae (Harv.) H.-S.Kim	7907318	EXACT	100	ACCEPTED	SPECIES	Chromista	Ochrophyta	Phaeophyceae	Ectocarpales	Acinetosporaceae	Feldmannia	Feldmannia mitchelliae
	Jania squamata (Linnaeus) J.H.Kim	Jania squamata (L.) J.H.Kim, Guiry & H.-G.Choi, 2007	6453197	EXACT	100	ACCEPTED	SPECIES	Plantae	Rhodophyta	Florideophyceae	Corallinales	Corallinaceae	Jania	Jania squamata
	Sargassum vulgare C.Agardh	Sargassum vulgare C.Agardh	3197125	EXACT	100	ACCEPTED	SPECIES	Chromista	Ochrophyta	Phaeophyceae	Fucales	Sargassaceae	Sargassum	Sargassum vulgare
	Anadyomene stellata (Wulfen) C.Agardh	Anadyomene stellata (Wulfen) C.Agardh	5272960	EXACT	100	SYNONYM	SPECIES	Plantae	Chlorophyta	Ulvophyceae	Cladophorales	Anadyomenaceae	Anadyomene	Anadyomene stellata
	Cystoseira humilis Schousboe ex Kützing	Cystoseira humilis Schousboe ex Kütz., 1860	3197719	EXACT	100	ACCEPTED	SPECIES	Chromista	Ochrophyta	Phaeophyceae	Fucales	Sargassaceae	Cystoseira	Cystoseira humilis
	Leptosiphonia brodiei (Dillwyn) Savoie & G.W.Saunders	Leptosiphonia Kylin, 1956	2660186	HIGHERRANK	96	ACCEPTED	GENUS	Plantae	Rhodophyta	Florideophyceae	Ceramiales	Rhodomelaceae	Leptosiphonia
	Vertebrata reptabunda (Suhr) Díaz-Tapia & Maggs	Vertebrata S.F.Gray, 1821	2660342	HIGHERRANK	96	ACCEPTED	GENUS	Plantae	Rhodophyta	Florideophyceae	Ceramiales	Rhodomelaceae	Vertebrata
	Gelidium corneum (Hudson) J.V.Lamouroux	Gelidium corneum (Huds.) J.V.Lamour.	2662882	EXACT	100	SYNONYM	SPECIES	Plantae	Rhodophyta	Florideophyceae	Gelidiales	Gelidiaceae	Gelidium	Gelidium spinosum
	Dasya corymbifera J.Agardh	Dasya corymbifera J.Agardh	2659195	EXACT	100	ACCEPTED	SPECIES	Plantae	Rhodophyta	Florideophyceae	Ceramiales	Dasyaceae	Dasya	Dasya corymbifera
	Ahnfeltiopsis devoniensis (Greville) P.C.Silva & DeCew	Ahnfeltiopsis devoniensis (Grev.) P.C.Silva & DeCew, 1992	2667221	EXACT	100	ACCEPTED	SPECIES	Plantae	Rhodophyta	Florideophyceae	Gigartinales	Phyllophoraceae	Ahnfeltiopsis	Ahnfeltiopsis devoniensis
	Hypnea arbuscula P.J.L.Dangeard	Hypnea J.V.Lamouroux, 1813	2668293	HIGHERRANK	96	ACCEPTED	GENUS	Plantae	Rhodophyta	Florideophyceae	Gigartinales	Cystocloniaceae	Hypnea
	Hypnea cervicornis J.Agardh	Hypnea cervicornis J.Agardh	2668382	EXACT	100	ACCEPTED	SPECIES	Plantae	Rhodophyta	Florideophyceae	Gigartinales	Cystocloniaceae	Hypnea	Hypnea cervicornis
	Itonoa marginifera (J.Agardh) Masuda & Guiry	Itonoa marginifera (J.Agardh) Masuda & Guiry, 1995	2667430	EXACT	100	ACCEPTED	SPECIES	Plantae	Rhodophyta	Florideophyceae	Nemastomatales	Nemastomataceae	Itonoa	Itonoa marginifera
	Ulva compressa Linnaeus	Ulva compressa L.	5273322	EXACT	100	ACCEPTED	SPECIES	Plantae	Chlorophyta	Ulvophyceae	Ulvales	Ulvaceae	Ulva	Ulva compressa
	Rhodophyllis divaricata (Stackhouse) Papenfuss	Rhodophyllis divaricata (Stackhouse) Papenfuss	2667707	EXACT	100	ACCEPTED	SPECIES	Plantae	Rhodophyta	Florideophyceae	Gigartinales	Cystocloniaceae	Rhodophyllis	Rhodophyllis divaricata
	Neoizziella divaricata (C.K.Tseng) S.-M.Lin	Neoizziella divaricata (C.K.Tseng) S.M.Lin, S.-Y.Yang & Huisman, 2011	8291154	EXACT	100	ACCEPTED	SPECIES	Plantae	Rhodophyta	Florideophyceae	Nemaliales	Liagoraceae	Neoizziella	Neoizziella divaricata
	Vertebrata fucoides (Hudson) Kuntze	Vertebrata fucoides (Huds.) Kuntze	8074783	EXACT	100	SYNONYM	SPECIES	Plantae	Rhodophyta	Florideophyceae	Ceramiales	Rhodomelaceae	Polysiphonia	Polysiphonia fucoides
	Dictyota ciliolata Sonder ex Kützing	Dictyota ciliolata O.G.Sond. ex Kütz.	5423446	EXACT	100	ACCEPTED	SPECIES	Chromista	Ochrophyta	Phaeophyceae	Dictyotales	Dictyotaceae	Dictyota	Dictyota ciliolata
	Vertebrata fruticulosa (Wulfen) Kuntze	Vertebrata fruticulosa (Wulfen) Kuntze, 1891	7549632	EXACT	100	ACCEPTED	SPECIES	Plantae	Rhodophyta	Florideophyceae	Ceramiales	Rhodomelaceae	Vertebrata	Vertebrata fruticulosa
	Bangia atropurpurea (Mertens ex Roth) C.Agardh	Bangia atropurpurea (Mertens ex Roth) C.Agardh	2653778	EXACT	100	ACCEPTED	SPECIES	Plantae	Rhodophyta	Bangiophyceae	Bangiales	Bangiaceae	Bangia	Bangia atropurpurea
	Dictyota cyanoloma Tronholm	Dictyota cyanoloma Tronholm, De Clerck, Gomez Garreta & Rull Lluch, 2010	8018048	EXACT	99	ACCEPTED	SPECIES	Chromista	Ochrophyta	Phaeophyceae	Dictyotales	Dictyotaceae	Dictyota	Dictyota cyanoloma
	Pseudorhizoclonium africanum (Kützing) Boedeker	Pseudorhizoclonium africanum (Kütz.) Boed., 2016	10269807	EXACT	99	SYNONYM	SPECIES	Plantae	Chlorophyta	Ulvophyceae	Cladophorales	Cladophoraceae	Rhizoclonium	Rhizoclonium africanum
	Ralfsia verrucosa (Areschoug) Areschoug	Ralfsia verrucosa (Aresch.) Aresch.	5423236	EXACT	100	ACCEPTED	SPECIES	Chromista	Ochrophyta	Bacillariophyceae			Ralfsia	Ralfsia verrucosa
	Cladophora albida (Nees) Kutzing	Cladophora albida (Nees) Kützing	5272397	EXACT	100	ACCEPTED	SPECIES	Plantae	Chlorophyta	Ulvophyceae	Cladophorales	Cladophoraceae	Cladophora	Cladophora albida
	Petalonia fascia (O.F.Müller) Kuntze	Petalonia fascia (O.F.Müll.) Kuntze	3197920	EXACT	99	ACCEPTED	SPECIES	Chromista	Ochrophyta	Phaeophyceae	Scytosiphonales	Scytosiphonaceae	Petalonia	Petalonia fascia
	Codium tomentosum Stackhouse	Codium tomentosum Stackh.	5272167	EXACT	100	ACCEPTED	SPECIES	Plantae	Chlorophyta	Ulvophyceae	Bryopsidales	Codiaceae	Codium	Codium tomentosum
	Codium fragile subsp. atlanticum (A.D.Cotton) P.C.Silva	Codium fragile subsp. atlanticum (Cotton) P.C.Silva	5272106	EXACT	100	ACCEPTED	SUBSPECIES	Plantae	Chlorophyta	Ulvophyceae	Bryopsidales	Codiaceae	Codium	Codium fragile
	Papenfussiella kuromo (Yendo) Inagaki	Papenfussiella Kylin, 1940	3199329	HIGHERRANK	96	ACCEPTED	GENUS	Chromista	Ochrophyta	Phaeophyceae	Ectocarpales	Chordariaceae	Papenfussiella
	Gracilariopsis longissima (S.G.Gmelin) Steentoft	Gracilariopsis longissima (S.G.Gmelin) M.Steentoft, L.M.Irvine & W.F.Farnham	2665870	EXACT	100	SYNONYM	SPECIES	Plantae	Rhodophyta	Florideophyceae	Gracilariales	Gracilariaceae	Gracilaria	Gracilaria longissima
	Sporochnus pedunculatus (Hudson) C.Agardh	Sporochnus pedunculatus (Huds.) C.Agardh	3196257	EXACT	100	ACCEPTED	SPECIES	Chromista	Ochrophyta	Phaeophyceae	Sporochnales	Sporochnaceae	Sporochnus	Sporochnus pedunculatus
	Halarachnion ligulatum (Woodward) Kützing	Halarachnion ligulatum (Woodward) Kützing	2666936	EXACT	100	ACCEPTED	SPECIES	Plantae	Rhodophyta	Florideophyceae	Gigartinales	Furcellariaceae	Halarachnion	Halarachnion ligulatum
	Vertebrata nigra (Hudson) Díaz-Tapia & Maggs	Vertebrata nigra (Hudson) Díaz-Tapia & Maggs, 2017	10391884	EXACT	91	SYNONYM	SPECIES	Plantae	Rhodophyta	Florideophyceae	Ceramiales	Rhodomelaceae	Polysiphonia	Polysiphonia nigra
	Nemoderma tingitanum Schousboe ex Bornet	Nemoderma tingitanum Schousboe ex Bornet, 1892	3199676	EXACT	100	ACCEPTED	SPECIES	Chromista	Ochrophyta	Phaeophyceae	Nemodermatales	Nemodermataceae	Nemoderma	Nemoderma tingitanum
	Lobophora variegata (J.V.Lamouroux) Womersley ex E.C.Oliveira	Lobophora variegata (J.V.Lamour.) Womersley ex E.C.Oliveira	3200482	EXACT	100	ACCEPTED	SPECIES	Chromista	Ochrophyta	Phaeophyceae	Dictyotales	Dictyotaceae	Lobophora	Lobophora variegata
	Antithamnion cruciatum (C.Agardh) Nägeli	Antithamnion cruciatum (C.Agardh) Nägeli	2657480	EXACT	100	ACCEPTED	SPECIES	Plantae	Rhodophyta	Florideophyceae	Ceramiales	Ceramiaceae	Antithamnion	Antithamnion cruciatum
	Petalonia binghamiae (J.Agardh) K.L.Vinogradova	Petalonia Derbès & Solier, 1850	3197913	HIGHERRANK	96	ACCEPTED	GENUS	Chromista	Ochrophyta	Phaeophyceae	Scytosiphonales	Scytosiphonaceae	Petalonia
	Bryopsis pennata J.V.Lamouroux	Bryopsis pennata J.V.Lamour.	5272060	EXACT	100	ACCEPTED	SPECIES	Plantae	Chlorophyta	Ulvophyceae	Bryopsidales	Bryopsidaceae	Bryopsis	Bryopsis pennata
	Cottoniella filamentosa (M.Howe) Børgesen	Cottoniella filamentosa (M.Howe) Børgesen	2662549	EXACT	100	ACCEPTED	SPECIES	Plantae	Rhodophyta	Florideophyceae	Ceramiales	Sarcomeniaceae	Cottoniella	Cottoniella filamentosa
	Erythrotrichia carnea (Dillwyn) J.Agardh	Erythrotrichia carnea (Dillwyn) J.Agardh	2653871	EXACT	100	ACCEPTED	SPECIES	Plantae	Rhodophyta	Compsopogonophyceae	Erythropeltidales	Erythrotrichiaceae	Erythrotrichia	Erythrotrichia carnea
	Stylonema alsidii (Zanardini) K.M.Drew	Stylonema alsidii (Zanardini) K.Drew	5275816	EXACT	100	ACCEPTED	SPECIES	Plantae	Rhodophyta	Stylonematophyceae	Stylonematales	Stylonemataceae	Stylonema	Stylonema alsidii
	Xiphosiphonia ardreana (Maggs & Hommersand) Savoie & G.W.Saunders	Xiphosiphonia Savoie & G.W.Saunders, 2016	9364476	HIGHERRANK	94	DOUBTFUL	GENUS	Plantae	Rhodophyta	Florideophyceae	Ceramiales	Rhodomelaceae	Xiphosiphonia
	Carpomitra costata (Stackhouse) Batters	Carpomitra costata (Stackh.) Batters	3196229	EXACT	100	ACCEPTED	SPECIES	Chromista	Ochrophyta	Phaeophyceae	Sporochnales	Sporochnaceae	Carpomitra	Carpomitra costata
	Cutleria multifida (Turner) Greville phase Aglaozonia parvula (Greville) Zanardini	Cutleria multifida (Turner) Grev.	5422862	HIGHERRANK	100	ACCEPTED	SPECIES	Chromista	Ochrophyta	Phaeophyceae	Cutleriales	Cutleriaceae	Cutleria	Cutleria multifida
	Ulva lactuca Linnaeus	Ulva lactuca L.	5273309	EXACT	100	ACCEPTED	SPECIES	Plantae	Chlorophyta	Ulvophyceae	Ulvales	Ulvaceae	Ulva	Ulva lactuca
	Bonnemaisonia asparagoides (Woodward) C.Agardh	Bonnemaisonia asparagoides (Woodward) C.Agardh	2668875	EXACT	100	ACCEPTED	SPECIES	Plantae	Rhodophyta	Florideophyceae	Bonnemaisoniales	Bonnemaisoniaceae	Bonnemaisonia	Bonnemaisonia asparagoides
	Predaea feldmannii subsp. azorica Gabriel	Predaea feldmannii Børgesen	2667440	HIGHERRANK	100	ACCEPTED	SPECIES	Plantae	Rhodophyta	Florideophyceae	Nemastomatales	Nemastomataceae	Predaea	Predaea feldmannii
	Herposiphonia secunda (C.Agardh) Ambronn	Herposiphonia secunda (C.Agardh) Ambronn	2659338	EXACT	100	ACCEPTED	SPECIES	Plantae	Rhodophyta	Florideophyceae	Ceramiales	Rhodomelaceae	Herposiphonia	Herposiphonia secunda
	Erythrodermis traillii (Holmes ex Batters) Guiry & Garbary	Erythrodermis traillii (Holmes ex Batters) Guiry & Garbary	2667281	EXACT	100	ACCEPTED	SPECIES	Plantae	Rhodophyta	Florideophyceae	Gigartinales	Phyllophoraceae	Erythrodermis	Erythrodermis traillii
	Asteromenia peltata (W.R.Taylor) Huisman & A.J.K.Millar	Asteromenia peltata (W.R.Taylor) Huisman & A.J.K.Millar	2663219	EXACT	100	ACCEPTED	SPECIES	Plantae	Rhodophyta	Florideophyceae	Rhodymeniales	Hymenocladiaceae	Asteromenia	Asteromenia peltata
	Cruoria pellita (Lyngbye) Fries	Cruoria pellita (Lyngbye) Fries	2666503	EXACT	100	ACCEPTED	SPECIES	Plantae	Rhodophyta	Florideophyceae	Gigartinales	Cruoriaceae	Cruoria	Cruoria pellita
	Microdictyon umbilicatum (Velley) Zanardini	Microdictyon umbilicatum (Velley) Zanardini	5272975	EXACT	100	ACCEPTED	SPECIES	Plantae	Chlorophyta	Ulvophyceae	Cladophorales	Anadyomenaceae	Microdictyon	Microdictyon umbilicatum
	Gymnothamnion elegans (Schousboe ex C.Agardh) J.Agardh	Gymnothamnion elegans (Schousb. ex C.Agardh) J.Agardh	2658371	EXACT	100	ACCEPTED	SPECIES	Plantae	Rhodophyta	Florideophyceae	Ceramiales	Ceramiaceae	Gymnothamnion	Gymnothamnion elegans
	Blidingia marginata (J.Agardh) P.J.L.Dangeard ex Bliding	Blidingia marginata (J.Agardh) P.J.L.Dang. ex Bliding	2645649	EXACT	100	SYNONYM	SPECIES	Plantae	Chlorophyta	Ulvophyceae	Ulvales	Kornmanniaceae	Blidingia	Blidingia marginata
	Myriactula rivulariae (Suhr ex Areschoug) Feldmann	Myriactula rivulariae (Suhr ex Aresch.) Feldmann	3198195	EXACT	100	ACCEPTED	SPECIES	Chromista	Ochrophyta	Phaeophyceae	Ectocarpales	Chordariaceae	Myriactula	Myriactula rivulariae
	Osmundea oederi (Gunnerus) G.Furnari	Osmundea oederi (Gunnerus) G.Furnari, 2008	4376014	EXACT	100	ACCEPTED	SPECIES	Plantae	Rhodophyta	Florideophyceae	Ceramiales	Rhodomelaceae	Osmundea	Osmundea oederi
	Elachista flaccida (Dillwyn) Fries	Elachista flaccida (Dillwyn) Fr.	5423038	EXACT	100	ACCEPTED	SPECIES	Chromista	Ochrophyta	Phaeophyceae	Ectocarpales	Chordariaceae	Elachista	Elachista flaccida
	Pseudolithoderma roscoffense Loiseaux	Pseudolithoderma roscoffense Loiseaux, 1968	3199654	EXACT	100	ACCEPTED	SPECIES	Chromista	Ochrophyta	Phaeophyceae	Ectocarpales	Lithodermataceae	Pseudolithoderma	Pseudolithoderma roscoffense
	Wrangelia penicillata (C.Agardh) C.Agardh	Wrangelia penicillata (C.Agardh) C.Agardh	2657842	EXACT	100	ACCEPTED	SPECIES	Plantae	Rhodophyta	Florideophyceae	Ceramiales	Wrangeliaceae	Wrangelia	Wrangelia penicillata
	Petrospongium berkeleyi (Greville) Nägeli ex Kützing	Petrospongium berkeleyi	3199152	EXACT	99	SYNONYM	SPECIES	Chromista	Ochrophyta	Phaeophyceae	Ectocarpales	Chordariaceae	Cylindrocarpus	Cylindrocarpus berkeleyi
	Aglaothamnion pseudobyssoides (P.Crouan & H.Crouan) Halos	Aglaothamnion pseudobyssoides (P.Crouan & H.Crouan) L'Hardy-Halos	2656956	EXACT	100	ACCEPTED	SPECIES	Plantae	Rhodophyta	Florideophyceae	Ceramiales	Callithamniaceae	Aglaothamnion	Aglaothamnion pseudobyssoides
	Amphiroa cryptarthrodia Zanardini	Amphiroa cryptarthrodia Zanardini, 1844	5276531	EXACT	100	ACCEPTED	SPECIES	Plantae	Rhodophyta	Florideophyceae	Corallinales	Corallinaceae	Amphiroa	Amphiroa cryptarthrodia
	Cladophora conferta P.Crouan & H.Crouan	Cladophora conferta P.Crouan & H.Crouan	5272866	EXACT	100	ACCEPTED	SPECIES	Plantae	Chlorophyta	Ulvophyceae	Cladophorales	Cladophoraceae	Cladophora	Cladophora conferta
	Dasya baillouviana (S.G.Gmelin) Montagne	Dasya baillouviana (S.G.Gmelin) Montagne	2659108	EXACT	100	ACCEPTED	SPECIES	Plantae	Rhodophyta	Florideophyceae	Ceramiales	Dasyaceae	Dasya	Dasya baillouviana
	Lychaete pellucida (Hudson) M.J.Wynne	Lychaete J.Agardh, 1846	2644499	HIGHERRANK	94	DOUBTFUL	GENUS	Plantae	Chlorophyta	Ulvophyceae	Cladophorales	Cladophoraceae	Lychaete
	Microdictyon boergesenii Setchell	Microdictyon boergesenii Setchell	5272974	EXACT	100	ACCEPTED	SPECIES	Plantae	Chlorophyta	Ulvophyceae	Cladophorales	Anadyomenaceae	Microdictyon	Microdictyon boergesenii
	Osmundea truncata (Kützing) K.W.Nam & Maggs	Osmundea truncata (Kützing) K.W.Nam & Maggs	2659435	EXACT	100	ACCEPTED	SPECIES	Plantae	Rhodophyta	Florideophyceae	Ceramiales	Rhodomelaceae	Osmundea	Osmundea truncata
	Pneophyllum confervicola (Kützing) Y.M.Chamberlain	Pneophyllum confervicola (Kützing) Y.M.Chamberlain	4376250	EXACT	100	ACCEPTED	SPECIES	Plantae	Rhodophyta	Florideophyceae	Corallinales	Corallinaceae	Pneophyllum	Pneophyllum confervicola
	Scageliopsis patens E.M.Wollaston	Scageliopsis E.M.Wollaston, 1981	2658417	HIGHERRANK	94	DOUBTFUL	GENUS	Plantae	Rhodophyta	Florideophyceae	Ceramiales	Ceramiaceae	Scageliopsis
	Gracilaria gracilis (Stackhouse) Steentoft	Gracilaria gracilis (Stackhouse) Steentoft, L.M.Irvine & Farnham	5278844	EXACT	100	ACCEPTED	SPECIES	Plantae	Rhodophyta	Florideophyceae	Gracilariales	Gracilariaceae	Gracilaria	Gracilaria gracilis
	Compsonema saxicola (Kuckuck) Kuckuck	Compsonema	8130573	HIGHERRANK	95	ACCEPTED	GENUS	Chromista	Ochrophyta	Phaeophyceae	Scytosiphonales	Scytosiphonaceae	Compsonema
	Laurencia microcladia Kützing	Laurencia microcladia Kütz.	2661026	EXACT	100	SYNONYM	SPECIES	Plantae	Rhodophyta	Florideophyceae	Ceramiales	Rhodomelaceae	Laurencia	Laurencia dendroidea
	Scytosiphon lomentaria (Lyngbye) Link	Scytosiphon lomentaria (Lyngb.) Link	5422803	EXACT	100	ACCEPTED	SPECIES	Chromista	Ochrophyta	Phaeophyceae	Scytosiphonales	Scytosiphonaceae	Scytosiphon	Scytosiphon lomentaria
	Crouania attenuata (C.Agardh) J.Agardh	Crouania attenuata (C.Agardh) J.Agardh	5276756	EXACT	100	ACCEPTED	SPECIES	Plantae	Rhodophyta	Florideophyceae	Ceramiales	Callithamniaceae	Crouania	Crouania attenuata
	Heterosiphonia crispella (C.Agardh) M.J.Wynne	Heterosiphonia crispella (C.Agardh) M.J.Wynne	2659070	EXACT	100	ACCEPTED	SPECIES	Plantae	Rhodophyta	Florideophyceae	Ceramiales	Dasyaceae	Heterosiphonia	Heterosiphonia crispella
	Hapalospongidion macrocarpum (Feldmann) León-Álvarez & González-González	Hapalospongidion macrocarpum (Feldmann) León-Alvarez & González-González	3199729	EXACT	92	ACCEPTED	SPECIES	Chromista	Ochrophyta	Phaeophyceae	Ralfsiales	Ralfsiaceae	Hapalospongidion	Hapalospongidion macrocarpum
	Leathesia marina (Lyngbye) Decaisne	Leathesia marina (Lyngb.) Decne.	7627628	EXACT	100	ACCEPTED	SPECIES	Chromista	Ochrophyta	Phaeophyceae	Ectocarpales	Chordariaceae	Leathesia	Leathesia marina
	Sphacelaria plumula Zanardini	Sphacelaria plumula Zanardini	3200690	EXACT	100	ACCEPTED	SPECIES	Chromista	Ochrophyta	Phaeophyceae	Sphacelariales	Sphacelariaceae	Sphacelaria	Sphacelaria plumula
	Sphacelaria tribuloides Meneghini	Sphacelaria tribuloides Menegh.	3200697	EXACT	100	ACCEPTED	SPECIES	Chromista	Ochrophyta	Phaeophyceae	Sphacelariales	Sphacelariaceae	Sphacelaria	Sphacelaria tribuloides
	Bachelotia antillarum (Grunow) Gerloff	Bachelotia antillarum (Grunow) Gerloff	3199421	EXACT	100	ACCEPTED	SPECIES	Chromista	Ochrophyta	Phaeophyceae	Scytothamnales	Bachelotiaceae	Bachelotia	Bachelotia antillarum
	Sphacelaria cirrosa (Roth) C.Agardh	Sphacelaria cirrosa (Roth) C.Agardh	3200617	EXACT	100	ACCEPTED	SPECIES	Chromista	Ochrophyta	Phaeophyceae	Sphacelariales	Sphacelariaceae	Sphacelaria	Sphacelaria cirrosa
	Sphacelaria rigidula Kützing	Sphacelaria rigidula Kütz.	3200710	EXACT	100	ACCEPTED	SPECIES	Chromista	Ochrophyta	Phaeophyceae	Sphacelariales	Sphacelariaceae	Sphacelaria	Sphacelaria rigidula
	Laurencia intricata J.V.Lamouroux	Laurencia intricata J.V.Lamour.	2659230	EXACT	100	DOUBTFUL	SPECIES	Plantae	Rhodophyta	Florideophyceae	Ceramiales	Rhodomelaceae	Laurencia	Laurencia intricata
	Xiphosiphonia pennata (C.Agardh) Savoie & G.W.Saunders	Xiphosiphonia pennata (C.Agardh) Savoie & G.W.Saunders, 2016	10497204	EXACT	100	SYNONYM	SPECIES	Plantae	Rhodophyta	Florideophyceae	Ceramiales	Rhodomelaceae	Pterosiphonia	Pterosiphonia pennata
	Feldmannia paradoxa (Montagne) Hamel	Feldmannia paradoxa (Mont.) Hamel	5423256	EXACT	100	ACCEPTED	SPECIES	Chromista	Ochrophyta	Phaeophyceae	Ectocarpales	Acinetosporaceae	Feldmannia	Feldmannia paradoxa
	Feldmannia irregularis (Kützing) Hamel	Feldmannia irregularis (Kütz.) Hamel	5423249	EXACT	99	ACCEPTED	SPECIES	Chromista	Ochrophyta	Phaeophyceae	Ectocarpales	Acinetosporaceae	Feldmannia	Feldmannia irregularis
	Hecatonema terminale (Kützing) Kylin	Hecatonema terminale (Kütz.) Kylin	3199308	EXACT	100	ACCEPTED	SPECIES	Chromista	Ochrophyta	Phaeophyceae	Ectocarpales	Chordariaceae	Hecatonema	Hecatonema terminale
	Stragularia clavata (Harvey) Hamel	Stragularia clavata (Harv.) Hamel	3197889	EXACT	100	ACCEPTED	SPECIES	Chromista	Ochrophyta	Phaeophyceae	Scytosiphonales	Scytosiphonaceae	Stragularia	Stragularia clavata
	Ectocarpus fasciculatus Harvey	Ectocarpus fasciculatus Harv.	3199608	EXACT	100	ACCEPTED	SPECIES	Chromista	Ochrophyta	Phaeophyceae	Ectocarpales	Ectocarpaceae	Ectocarpus	Ectocarpus fasciculatus
	Laurencia tenera C.K.Tseng	Laurencia tenera C.K.Tseng, 1943	2661100	EXACT	100	ACCEPTED	SPECIES	Plantae	Rhodophyta	Florideophyceae	Ceramiales	Rhodomelaceae	Laurencia	Laurencia tenera
	Bryopsis cupressina J.V.Lamouroux	Bryopsis cupressina J.V.Lamour., 1809	5272002	EXACT	100	ACCEPTED	SPECIES	Plantae	Chlorophyta	Ulvophyceae	Bryopsidales	Bryopsidaceae	Bryopsis	Bryopsis cupressina
	Cladophoropsis membranacea (Hofman Bang ex C.Agardh) Børgesen	Cladophoropsis membranacea (Bang ex C.Agardh) Børgesen	2644890	EXACT	100	ACCEPTED	SPECIES	Plantae	Chlorophyta	Ulvophyceae	Siphonocladales	Boodleaceae	Cladophoropsis	Cladophoropsis membranacea
	Erythrocystis montagnei (Derbès & Solier) P.C.Silva	Erythrocystis montagnei (Derbès & Solier) P.C.Silva, 1952	2660013	EXACT	100	ACCEPTED	SPECIES	Plantae	Rhodophyta	Florideophyceae	Ceramiales	Rhodomelaceae	Erythrocystis	Erythrocystis montagnei
	Phyllophora gelidioides P.Crouan & H.Crouan ex Karsakoff	Phyllophora Greville, 1830	2667343	HIGHERRANK	96	ACCEPTED	GENUS	Plantae	Rhodophyta	Florideophyceae	Gigartinales	Phyllophoraceae	Phyllophora
	Platysiphonia delicata (Clemente) Cremades	Platysiphonia delicata (Clemente) Cremades	2662532	EXACT	100	ACCEPTED	SPECIES	Plantae	Rhodophyta	Florideophyceae	Ceramiales	Sarcomeniaceae	Platysiphonia	Platysiphonia delicata
	Blidingia minima (Nägeli ex Kützing) Kylin	Blidingia minima (Nägeli ex Kütz.) Kylin	2645670	EXACT	100	ACCEPTED	SPECIES	Plantae	Chlorophyta	Ulvophyceae	Ulvales	Kornmanniaceae	Blidingia	Blidingia minima
	Dasya crouaniana J.Agardh	Dasya crouaniana J.Agardh	2659148	EXACT	100	ACCEPTED	SPECIES	Plantae	Rhodophyta	Florideophyceae	Ceramiales	Dasyaceae	Dasya	Dasya crouaniana
	Ulva prolifera O.F.Müller	Ulva prolifera O.F.Müll.	5273366	EXACT	100	ACCEPTED	SPECIES	Plantae	Chlorophyta	Ulvophyceae	Ulvales	Ulvaceae	Ulva	Ulva prolifera
	Vertebrata tripinnata (Harvey) Kuntze	Vertebrata S.F.Gray, 1821	2660342	HIGHERRANK	96	ACCEPTED	GENUS	Plantae	Rhodophyta	Florideophyceae	Ceramiales	Rhodomelaceae	Vertebrata
	Stichothamnion cymatophilum Børgesen	Stichothamnion cymatophilum Børgesen	2659667	EXACT	99	ACCEPTED	SPECIES	incertae sedis						Stichothamnion cymatophilum
	Halurus flosculosus (J.Ellis) Maggs & Hommersand	Halurus flosculosus (J.Ellis) Maggs & Hommers.	2658766	EXACT	100	ACCEPTED	SPECIES	Plantae	Rhodophyta	Florideophyceae	Ceramiales	Wrangeliaceae	Halurus	Halurus flosculosus
	Catenella caespitosa (Withering) L.M.Irvine	Catenella caespitosa (With.) L.M.Irvine	5279220	EXACT	100	ACCEPTED	SPECIES	Plantae	Rhodophyta	Florideophyceae	Gigartinales	Caulacanthaceae	Catenella	Catenella caespitosa
	Coelothrix irregularis (Harvey) Børgesen	Coelothrix irregularis (Harv.) Børgesen	2663368	EXACT	100	ACCEPTED	SPECIES	Plantae	Rhodophyta	Florideophyceae	Rhodymeniales	Champiaceae	Coelothrix	Coelothrix irregularis
	Stylonema cornu-cervi Reinsch	Stylonema cornu-cervi Reinsch, 1875	5275822	EXACT	100	ACCEPTED	SPECIES	Plantae	Rhodophyta	Stylonematophyceae	Stylonematales	Stylonemataceae	Stylonema	Stylonema cornu-cervi
	Ceratodictyon intricatum (C.Agardh) R.E.Norris	Ceratodictyon intricatum (C.Agardh) R.E.Norris	2663508	EXACT	100	ACCEPTED	SPECIES	Plantae	Rhodophyta	Florideophyceae	Rhodymeniales	Lomentariaceae	Ceratodictyon	Ceratodictyon intricatum
	Diplothamnion jolyi C.Hoek	Diplothamnion jolyi Hoek, 1978	2657801	EXACT	100	ACCEPTED	SPECIES	Plantae	Rhodophyta	Florideophyceae	Ceramiales	Wrangeliaceae	Diplothamnion	Diplothamnion jolyi
	Griffithsia phyllamphora J.Agardh	Griffithsia phyllamphora J.Agardh, 1842	2657551	EXACT	100	ACCEPTED	SPECIES	Plantae	Rhodophyta	Florideophyceae	Ceramiales	Wrangeliaceae	Griffithsia	Griffithsia phyllamphora
	Gayralia oxysperma (Kützing) K.L.Vinogradova ex Scagel & al.	Gayralia oxysperma (Kütz.) K.L.Vinogr. ex Scagel et al.	2645412	EXACT	99	ACCEPTED	SPECIES	Plantae	Chlorophyta	Ulvophyceae	Ulvales	Gayraliaceae	Gayralia	Gayralia oxysperma
	Ulva ralfsii (Harvey) Le Jolis	Ulva ralfsii (Harv.) Le Jol.	5273425	EXACT	100	ACCEPTED	SPECIES	Plantae	Chlorophyta	Ulvophyceae	Ulvales	Ulvaceae	Ulva	Ulva ralfsii
	Antithamnionella ternifolia (J.D.Hooker & Harvey) Lyle	Antithamnionella ternifolia (J.D.Hooker & Harvey) Lyle	2657641	EXACT	100	ACCEPTED	SPECIES	Plantae	Rhodophyta	Florideophyceae	Ceramiales	Ceramiaceae	Antithamnionella	Antithamnionella ternifolia
	Hincksia ovata (Kjellman) P.C.Silva	Hincksia ovata (Kjellm.) P.C.Silva	5423301	EXACT	100	ACCEPTED	SPECIES	Chromista	Ochrophyta	Phaeophyceae	Ectocarpales	Acinetosporaceae	Hincksia	Hincksia ovata
	Punctaria tenuissima (C.Agardh) Greville	Punctaria tenuissima (C.Agardh) Grev.	3199244	EXACT	100	ACCEPTED	SPECIES	Chromista	Ochrophyta	Phaeophyceae	Ectocarpales	Chordariaceae	Punctaria	Punctaria tenuissima
	Amphiroa rigida J.V.Lamouroux	Amphiroa rigida J.V.Lamour.	5276551	EXACT	100	ACCEPTED	SPECIES	Plantae	Rhodophyta	Florideophyceae	Corallinales	Corallinaceae	Amphiroa	Amphiroa rigida
	Cladophora hutchinsiae (Dillwyn) Kützing	Cladophora hutchinsiae (Dillwyn) Kütz.	5272575	EXACT	100	ACCEPTED	SPECIES	Plantae	Chlorophyta	Ulvophyceae	Cladophorales	Cladophoraceae	Cladophora	Cladophora hutchinsiae
	Caulerpa prolifera (Forsskal) J.V.Lamouroux	Caulerpa prolifera (Forssk.) J.V.Lamour.	2643011	EXACT	100	ACCEPTED	SPECIES	Plantae	Chlorophyta	Ulvophyceae	Bryopsidales	Caulerpaceae	Caulerpa	Caulerpa prolifera
	Laurenciella marilzae (Gil-Rodríguez, Sentíes, Díaz-Larrea, Cassano & M.T.Fujii) Gil-Rodríguez, Sentíes, Díaz-Larrea, Cassano & M.T.Fujii	Laurenciella marilzae (Gil-Rodríguez et al.) Gil-Rodríguez et al.	7605242	EXACT	96	ACCEPTED	SPECIES	Plantae	Rhodophyta	Florideophyceae	Ceramiales	Rhodomelaceae	Laurenciella	Laurenciella marilzae
	Bryopsis duplex De Notaris	Bryopsis duplex De Not., 1844	5272041	EXACT	100	ACCEPTED	SPECIES	Plantae	Chlorophyta	Ulvophyceae	Bryopsidales	Bryopsidaceae	Bryopsis	Bryopsis duplex
	Chondria capillaris (Hudson) M.J.Wynne	Chondria capillaris (Huds.) M.J.Wynne	5279778	EXACT	100	ACCEPTED	SPECIES	Plantae	Rhodophyta	Florideophyceae	Ceramiales	Rhodomelaceae	Chondria	Chondria capillaris
	Haraldia lenormandii (Derbès & Solier) Feldmann	Haraldia lenormandii (Derbès & Solier) Feldmann, 1939	2662300	EXACT	100	ACCEPTED	SPECIES	Plantae	Rhodophyta	Florideophyceae	Ceramiales	Delesseriaceae	Haraldia	Haraldia lenormandii
	Antithamnion decipiens (J.Agardh) Athanasiadis	Antithamnion decipiens (J.Agardh) Athanasiadis, 1996	2657440	EXACT	100	ACCEPTED	SPECIES	Plantae	Rhodophyta	Florideophyceae	Ceramiales	Ceramiaceae	Antithamnion	Antithamnion decipiens
	Wurdemannia miniata (Sprengel) Feldmann & Hamel	Wurdemannia miniata (Spreng.) Feldmann & Hamel	8591304	EXACT	100	ACCEPTED	SPECIES	Plantae	Rhodophyta	Florideophyceae	Gigartinales	Solieriaceae	Wurdemannia	Wurdemannia miniata
	Antithamnionella floccosa (O.F.Müller) Whittick	Antithamnionella floccosa (O.F.Müller) Whittick, 1980	2657622	EXACT	100	ACCEPTED	SPECIES	Plantae	Rhodophyta	Florideophyceae	Ceramiales	Ceramiaceae	Antithamnionella	Antithamnionella floccosa
	Grallatoria reptans M.Howe	Grallatoria reptans M.Howe	2657615	EXACT	100	ACCEPTED	SPECIES	Plantae	Rhodophyta	Florideophyceae	Ceramiales	Wrangeliaceae	Grallatoria	Grallatoria reptans
	Antithamnionella boergesenii (Cormaci & G.Furnari) Athanasiadis	Antithamnionella boergesenii (Cormaci & G.Furnari) Athanas.	2657657	EXACT	100	ACCEPTED	SPECIES	Plantae	Rhodophyta	Florideophyceae	Ceramiales	Ceramiaceae	Antithamnionella	Antithamnionella boergesenii
	Gymnophycus hapsiphorus Huisman & Kraft	Gymnophycus Huisman & Kraft, 1983	2657304	HIGHERRANK	94	DOUBTFUL	GENUS	Plantae	Rhodophyta	Florideophyceae	Ceramiales	Wrangeliaceae	Gymnophycus
	Aphanocladia stichidiosa (Funk) Ardré	Aphanocladia stichidiosa (Funk) Ardré, 1970	2659232	EXACT	100	ACCEPTED	SPECIES	Plantae	Rhodophyta	Florideophyceae	Ceramiales	Rhodomelaceae	Aphanocladia	Aphanocladia stichidiosa
	Compsothamnion decompositum (J.Agardh) Maggs & L'Hardy-Halos	Compsothamnion decompositum (J.Agardh) Maggs & L'Hardy-Halos, 1993	2658748	EXACT	100	ACCEPTED	SPECIES	Plantae	Rhodophyta	Florideophyceae	Ceramiales	Wrangeliaceae	Compsothamnion	Compsothamnion decompositum
	Pseudolithoderma adriaticum (Hauck) Verlaque	Pseudolithoderma adriaticum (Hauck) Verlaque, 1988	3199657	EXACT	100	ACCEPTED	SPECIES	Chromista	Ochrophyta	Phaeophyceae	Ectocarpales	Lithodermataceae	Pseudolithoderma	Pseudolithoderma adriaticum
	Anotrichium tenue (C.Agardh) Nägeli	Anotrichium tenue (C.Agardh) Nägeli	2656867	EXACT	100	ACCEPTED	SPECIES	Plantae	Rhodophyta	Florideophyceae	Ceramiales	Wrangeliaceae	Anotrichium	Anotrichium tenue
	Cryptonemia crenulata (J.Agardh) J.Agardh	Cryptonemia crenulata (J.Agardh) J.Agardh	2656654	EXACT	100	ACCEPTED	SPECIES	Plantae	Rhodophyta	Florideophyceae	Halymeniales	Halymeniaceae	Cryptonemia	Cryptonemia crenulata
	Bonnemaisonia hamifera Hariot	Bonnemaisonia hamifera Hariot	2668884	EXACT	100	ACCEPTED	SPECIES	Plantae	Rhodophyta	Florideophyceae	Bonnemaisoniales	Bonnemaisoniaceae	Bonnemaisonia	Bonnemaisonia hamifera
	Gastroclonium clavatum (Roth) Ardissone	Gastroclonium clavatum (Roth) Ardiss.	2663779	EXACT	99	SYNONYM	SPECIES	Plantae	Rhodophyta	Florideophyceae	Rhodymeniales	Champiaceae	Gastroclonium	Gastroclonium ovatum
	Vertebrata hypnoides (Welwitsch) Kuntze	Vertebrata S.F.Gray, 1821	2660342	HIGHERRANK	96	ACCEPTED	GENUS	Plantae	Rhodophyta	Florideophyceae	Ceramiales	Rhodomelaceae	Vertebrata
	Cladophora dalmatica Kützing	Cladophora dalmatica Kützing	5272697	EXACT	100	ACCEPTED	SPECIES	Plantae	Chlorophyta	Ulvophyceae	Cladophorales	Cladophoraceae	Cladophora	Cladophora dalmatica
	Cryptonemia seminervis (C.Agardh) J.Agardh	Cryptonemia seminervis (C.Agardh) J.Agardh	2656641	EXACT	100	ACCEPTED	SPECIES	Plantae	Rhodophyta	Florideophyceae	Halymeniales	Halymeniaceae	Cryptonemia	Cryptonemia seminervis
	Predaea feldmannii Børgesen	Predaea feldmannii Børgesen	2667440	EXACT	100	ACCEPTED	SPECIES	Plantae	Rhodophyta	Florideophyceae	Nemastomatales	Nemastomataceae	Predaea	Predaea feldmannii
	Agardhinula browneae (J.Agardh) De Toni	Agardhinula browneae (J.G.Agardh) G.B.De Toni	2663640	EXACT	100	ACCEPTED	SPECIES	Plantae	Rhodophyta	Florideophyceae	Rhodymeniales	Rhodymeniaceae	Agardhinula	Agardhinula browneae
	Bostrychia scorpioides (Hudson) Montagne	Bostrychia scorpioides (Huds.) Mont.	7355971	EXACT	100	SYNONYM	SPECIES	Plantae	Rhodophyta	Florideophyceae	Ceramiales	Rhodomelaceae	Bostrychia	Bostrychia montagnei
	Ulothrix flacca (Dillwyn) Thuret	Ulothrix flacca (Dillwyn) Thur.	2646293	EXACT	100	ACCEPTED	SPECIES	Plantae	Chlorophyta	Ulvophyceae	Ulotrichales	Ulotrichaceae	Ulothrix	Ulothrix flacca
	Ulva linza Linnaeus	Ulva linza L.	5273454	EXACT	100	ACCEPTED	SPECIES	Plantae	Chlorophyta	Ulvophyceae	Ulvales	Ulvaceae	Ulva	Ulva linza
	Millerella tinerfensis (Seoane-Camba) S.M.Boo & J.M.Rico	Millerella G.H.Boo & S.M.Boo, 2016	10092748	HIGHERRANK	96	ACCEPTED	GENUS	Plantae	Rhodophyta	Florideophyceae	Gelidiales	Gelidiellaceae	Millerella
	Valonia macrophysa Kützing	Valonia macrophysa Kütz.	5273065	EXACT	100	ACCEPTED	SPECIES	Plantae	Chlorophyta	Ulvophyceae	Siphonocladales	Valoniaceae	Valonia	Valonia macrophysa
	Erythroglossum laciniatum (Lightfoot) Maggs & Hommersand	Erythroglossum laciniatum (Lightf.) Maggs & Hommers., 1993	2661869	EXACT	100	ACCEPTED	SPECIES	Plantae	Rhodophyta	Florideophyceae	Ceramiales	Delesseriaceae	Erythroglossum	Erythroglossum laciniatum
	Porphyrostromium ciliare (Carmichael) M.J.Wynne	Porphyrostromium ciliare (Carmichael) M.J.Wynne, 1986	2653803	EXACT	100	ACCEPTED	SPECIES	Plantae	Rhodophyta	Compsopogonophyceae	Erythropeltidales	Erythrotrichiaceae	Porphyrostromium	Porphyrostromium ciliare
	Dasya caraibica Børgesen	Dasya caraibica Borgesen	2659188	EXACT	100	ACCEPTED	SPECIES	Plantae	Rhodophyta	Florideophyceae	Ceramiales	Dasyaceae	Dasya	Dasya caraibica
	Polysiphonia havanensis Montagne	Polysiphonia havanensis Mont.	5277633	EXACT	100	ACCEPTED	SPECIES	Plantae	Rhodophyta	Florideophyceae	Ceramiales	Rhodomelaceae	Polysiphonia	Polysiphonia havanensis
	Polysiphonia stricta (Mertens ex Dillwyn) Greville	Polysiphonia stricta (Dillwyn) Greville	5277926	EXACT	100	ACCEPTED	SPECIES	Plantae	Rhodophyta	Florideophyceae	Ceramiales	Rhodomelaceae	Polysiphonia	Polysiphonia stricta
	Hildenbrandia rubra (Sommerfelt) Meneghini	Hildenbrandia rubra (Sommerfelt) Meneghini	2665377	EXACT	100	ACCEPTED	SPECIES	Plantae	Rhodophyta	Florideophyceae	Hildenbrandiales	Hildenbrandiaceae	Hildenbrandia	Hildenbrandia rubra
	Eupogodon planus (C.Agardh) Kützing	Eupogodon planus (C.Agardh) Kütz., 1845	8287392	EXACT	100	ACCEPTED	SPECIES	Plantae	Rhodophyta	Florideophyceae	Ceramiales	Dasyaceae	Eupogodon	Eupogodon planus
	Monosporus pedicellatus (Smith) Solier	Monosporus pedicellatus (Sm.) Solier & Castagne	2657030	EXACT	100	ACCEPTED	SPECIES	Plantae	Rhodophyta	Florideophyceae	Ceramiales	Wrangeliaceae	Monosporus	Monosporus pedicellatus
	Palisada corallopsis (Montagne) Sentíes	Palisada corallopsis (Mont.) Sentíes, M.T.Fujii & Díaz-Larrea	6452886	EXACT	100	ACCEPTED	SPECIES	Plantae	Rhodophyta	Florideophyceae	Ceramiales	Rhodomelaceae	Palisada	Palisada corallopsis
	Chaetomorpha pachynema (Montagne) Kützing	Chaetomorpha pachynema (Mont.) Kütz.	2644584	EXACT	100	ACCEPTED	SPECIES	Plantae	Chlorophyta	Ulvophyceae	Cladophorales	Cladophoraceae	Chaetomorpha	Chaetomorpha pachynema
	Gracilaria multipartita (Clemente) Harvey	Gracilaria multipartita (Clemente) Harvey, 1846	5278909	EXACT	100	ACCEPTED	SPECIES	Plantae	Rhodophyta	Florideophyceae	Gracilariales	Gracilariaceae	Gracilaria	Gracilaria multipartita
	Fucus spiralis Linnaeus	Fucus spiralis L.	3196369	EXACT	100	ACCEPTED	SPECIES	Chromista	Ochrophyta	Phaeophyceae	Fucales	Fucaceae	Fucus	Fucus spiralis
	Cladophora liebetruthii Grunow	Cladophora liebetruthii Grunow, 1884	5272569	EXACT	100	ACCEPTED	SPECIES	Plantae	Chlorophyta	Ulvophyceae	Cladophorales	Cladophoraceae	Cladophora	Cladophora liebetruthii
	Neopyropia leucosticta (Thuret) L.-E.Yang & J.Brodie	Plantae	6	HIGHERRANK	99	ACCEPTED	KINGDOM	Plantae
	Laurencia dendroidea J.Agardh	Laurencia dendroidea J.Agardh	2661140	EXACT	100	ACCEPTED	SPECIES	Plantae	Rhodophyta	Florideophyceae	Ceramiales	Rhodomelaceae	Laurencia	Laurencia dendroidea
	Ulva polyclada Kraft	Ulva polyclada Kraft, 2007	5729880	EXACT	100	ACCEPTED	SPECIES	Plantae	Chlorophyta	Ulvophyceae	Ulvales	Ulvaceae	Ulva	Ulva polyclada
	Cutleria multifida (Turner) Greville	Cutleria multifida (Turner) Grev.	5422862	EXACT	100	ACCEPTED	SPECIES	Chromista	Ochrophyta	Phaeophyceae	Cutleriales	Cutleriaceae	Cutleria	Cutleria multifida
	Dictyota fasciola (Roth) J.V.Lamouroux	Dictyota fasciola (Roth) J.V.Lamour., 1809	5423462	EXACT	100	ACCEPTED	SPECIES	Chromista	Ochrophyta	Phaeophyceae	Dictyotales	Dictyotaceae	Dictyota	Dictyota fasciola
	Corallina ferreyrae E.Y.Dawson	Corallina ferreyrai E.Y.Dawson et al.	5730171	FUZZY	95	ACCEPTED	SPECIES	Plantae	Rhodophyta	Florideophyceae	Corallinales	Corallinaceae	Corallina	Corallina ferreyrai
	Antithamnion hubbsii E.Y.Dawson	Antithamnion hubbsii E.Y.Dawson, 1962	2657472	EXACT	100	ACCEPTED	SPECIES	Plantae	Rhodophyta	Florideophyceae	Ceramiales	Ceramiaceae	Antithamnion	Antithamnion hubbsii
	Polysiphonia opaca (C.Agardh) Moris & De Notaris	Polysiphonia opaca (C.Agardh) Moris & De Not., 1839	5277953	EXACT	100	ACCEPTED	SPECIES	Plantae	Rhodophyta	Florideophyceae	Ceramiales	Rhodomelaceae	Polysiphonia	Polysiphonia opaca
	Antithamnionella spirographidis (Schiffner) E.M.Wollaston	Antithamnionella spirographidis (Schiffner) E.M.Wollaston	2657651	EXACT	100	ACCEPTED	SPECIES	Plantae	Rhodophyta	Florideophyceae	Ceramiales	Ceramiaceae	Antithamnionella	Antithamnionella spirographidis
	Xiphosiphonia pinnulata (Kützing) Savoie & G.W.Saunders	Xiphosiphonia Savoie & G.W.Saunders, 2016	9364476	HIGHERRANK	94	DOUBTFUL	GENUS	Plantae	Rhodophyta	Florideophyceae	Ceramiales	Rhodomelaceae	Xiphosiphonia
	Spyridia filamentosa (Wulfen) Harvey	Spyridia filamentosa (Wulfen) Harv.	2657164	EXACT	100	ACCEPTED	SPECIES	Plantae	Rhodophyta	Florideophyceae	Ceramiales	Spyridiaceae	Spyridia	Spyridia filamentosa
